# Supplementary material for: Propidium Monoazide-Treated, Cell-Direct, Quantitative PCR for Detecting Viable Chloramphenicol-Resistant Escherichia coli and Corynebacterium glutamicum Cells
Source: MDPI journal article supplement (doi:10.3390/genes14122135), 2023-11-27
Supplement: s1 [file s1]

## *Supplementary Material*

### **1 Supplementary Data**

#### **1.1 Materials and methods**

##### Protein extraction and Enzyme-Linked Immunosorbent Assay

The proteins from two bacterial strains were extracted using 1XPBS buffer (137 mM NaCl, 2.7 mM KCl, 8 mM Na<sub>2</sub>HPO<sub>4</sub>, 2 mM KH<sub>2</sub>PO<sub>4</sub>, pH 7.4) based on the protocol for extracting chloramphenicol from cells, which was adapted from the chloramphenicol competitive ELISA kit (Cell Biolabs, Inc., San Diego, CA, USA). Briefly,  $1 \times 10^9$ ,  $1 \times 10^8$ ,  $1 \times 10^7$ ,  $1 \times 10^6$  and  $1 \times 10^5$  cells (based on CFU/mL of 18 h culture cells) were respectively centrifuged at 13,000 rpm at 4 °C for 10 min, and then the supernatants were removed, the pellet was resuspended in 1 mL of cold PBS by vortexing for 30 s. The tubes containing cell suspensions were maintained on ice, and the cells were homogenized ten times for 2 seconds each, with a 1-second interval between each homogenization, respectively. After the homogenization, the tubes were left on ice for 30 minutes. The supernatant was centrifuged at 4 °C for 10 min at 13,000 rpm and then transferred to a new 1.5 ml tube. All samples were stored at -80 °C till further analysis.

To quantify chloramphenicol concentrations, Enzyme-Linked Immunosorbent Assay (ELISA) was performed on prepared protein samples using the supported technical protocol. Chloramphenicol standards were prepared for each experiment, with dilution series in the concentration range of 0, 0.37, 1.5, 6, 23, 94, 375 and 1500 nM /mL. The ELISA plate was read for absorbance at 450nm using a Multiskan SkyHigh microplate spectrophotometer (Thermo Fisher Scientific, Waltham, MA, USA). The samples were prepared in two replicates and three separate ELISAs were performed, and the average chloramphenicol concentrations were calculated.

### **2 Supplementary Figures and Tables**

(A) Specificity of dual-plex qPCR for *E.coli* targeting *CmR/dxs*

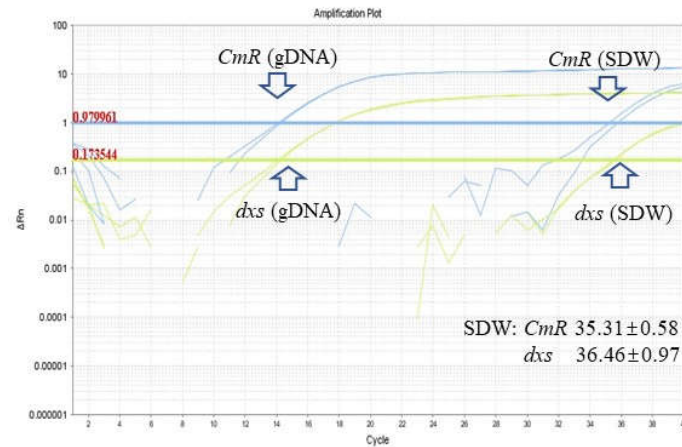

(B) Specificity of dual-plex qPCR for *C.glutamicum* targeting *CmR/dnaA*

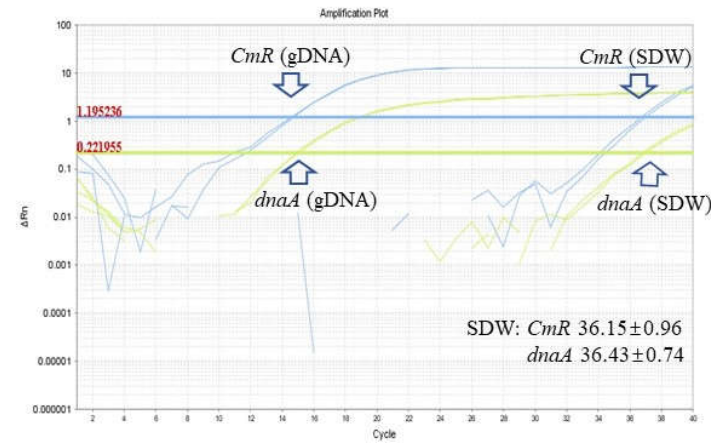

**Figure S1.** Dual-plex qPCR using genome DNA of genetically modified *Escherichia coli* (*E.coli*) and *Corynebacterium glutamicum* (*C.glutamicum*) strain to verify specificity of primer and probe combinations. (A) qPCR for *E.coli* targeting *CmR/dxs*; (B) qPCR for *C.glutamicum* targeting *CmR/dnaA*; Sterile distilled water (SDW) was used as negative control.

**Table S1.** Repeatability and precision of dual-plex qPCR assay for chloramphenicol resistant gene (*CmR*) and taxon-specific genes *dxs* for *Escherichia coli* and *dnaA* for *Corynebacterium glutamicum* using serial dilutions of genome DNA from two cell strains.

| Species                                       | Targets                         | True copy | Mean Cq | Mean copy | SD   | RSDr % | Bias % | Total DNAs (ng) |
|-----------------------------------------------|---------------------------------|-----------|---------|-----------|------|--------|--------|-----------------|
| <i>Escherichia coli</i><br>(pACYC184)         | <i>CmR</i><br>(plasmid<br>DNA)  | 100000000 | 16.95   | 99866153  | 0.09 | 0.50   | -0.13  | 0.465           |
|                                               |                                 | 10000000  | 20.12   | 11104820  | 0.33 | 1.62   | 11.05  | 0.0465          |
|                                               |                                 | 1000000   | 23.66   | 955873    | 0.40 | 1.67   | -4.41  | 0.00465         |
|                                               |                                 | 100000    | 27.24   | 80472     | 0.51 | 1.85   | -19.53 | 0.000465        |
|                                               |                                 | 10000     | 30.02   | 11732     | 0.12 | 0.39   | 17.32  | 0.0000465       |
|                                               | <i>dxs</i><br>(genomic<br>DNA)  | 100000000 | 16.05   | 89658195  | 0.06 | 0.38   | -10.34 | 500             |
|                                               |                                 | 10000000  | 19.11   | 11404273  | 0.06 | 0.32   | 14.04  | 50              |
|                                               |                                 | 1000000   | 22.61   | 1078394   | 0.05 | 0.23   | 7.84   | 5               |
|                                               |                                 | 100000    | 26.30   | 89719     | 0.08 | 0.30   | -10.28 | 0.5             |
|                                               |                                 | 10000     | 29.54   | 10108     | 0.09 | 0.30   | 1.08   | 0.05            |
| <i>Corynebacterium glutamicum</i><br>(pXJM19) | <i>CmR</i><br>(plasmid<br>DNA)  | 100000000 | 17.77   | 111445317 | 0.03 | 0.18   | 11.45  | 1.13            |
|                                               |                                 | 10000000  | 21.17   | 9169469   | 0.06 | 0.29   | -8.31  | 0.113           |
|                                               |                                 | 1000000   | 24.17   | 1010851   | 0.04 | 0.18   | 1.09   | 0.0113          |
|                                               |                                 | 100000    | 27.58   | 82592     | 0.06 | 0.21   | -17.41 | 0.00113         |
|                                               |                                 | 10000     | 30.24   | 11743     | 0.05 | 0.15   | 17.43  | 0.000113        |
|                                               | <i>dnaA</i><br>(genomic<br>DNA) | 100000000 | 14.92   | 80463953  | 0.07 | 0.46   | -19.54 | 360             |
|                                               |                                 | 10000000  | 17.79   | 12294394  | 0.11 | 0.64   | 22.94  | 36              |
|                                               |                                 | 1000000   | 21.52   | 1067311   | 0.15 | 0.68   | 6.73   | 3.60            |
|                                               |                                 | 100000    | 25.11   | 102234    | 0.10 | 0.41   | 2.23   | 0.36            |
|                                               |                                 | 10000     | 28.63   | 10165     | 0.12 | 0.42   | 1.65   | 0.036           |

**Table S2.** Cell-direct and PMA-treated cell-direct dual-plex qPCR performance at serial diluted points.

| Bacterial species                             | Serial dilution    | Cell-direct qPCR performance |       |             |       | PMA treated cell-direct qPCR performance |       |             |       |
|-----------------------------------------------|--------------------|------------------------------|-------|-------------|-------|------------------------------------------|-------|-------------|-------|
|                                               | Targets            | <i>CmR</i>                   | RSDr% | <i>dxs</i>  | RSDr% | <i>CmR</i>                               | RSDr% | <i>dxs</i>  | RSDr% |
| <i>Escherichia coli</i><br>(pACYC184)         | Cell culture (18h) | 19.31±0.23                   | 1.20  | 20.29±0.26  | 1.28  | 19.74±0.25                               | 1.29  | 22.29±0.03  | 0.14  |
|                                               | 10 <sup>-1</sup>   | 21.03±0.61                   | 2.88  | 21.71±0.34  | 1.57  | 24.12±0.41                               | 1.69  | 25.68±0.07  | 0.27  |
|                                               | 10 <sup>-2</sup>   | 24.07±0.77                   | 3.22  | 24.95±0.65  | 2.61  | 27.82±0.74                               | 2.65  | 29.00±0.14  | 0.48  |
|                                               | 10 <sup>-3</sup>   | 27.43±0.69                   | 2.51  | 28.21±0.53  | 1.88  | 31.11±0.70                               | 2.24  | 32.31±0.32  | 1.00  |
|                                               | 10 <sup>-4</sup>   | 30.65±1.14                   | 3.71  | 31.27±0.94  | 3.01  | 34.95±0.43                               | 1.22  | 35.67±0.38  | 1.07  |
|                                               | 10 <sup>-5</sup>   | 33.28±1.24                   | 3.73  | 34.15±0.62  | 1.82  | 37.52±0.42                               | 1.12  | 37.90±0.48  | 1.27  |
| Negative control (matrix)                     | LB                 | 35.49±0.14                   | 0.39  | 35.43±1.01  | 2.84  | 37.07±1.34                               | 3.63  | 39.04±0.40  | 1.01  |
|                                               | SDW                | 35.76±0.66                   | 1.83  | 36.35±0.53  | 1.45  | -                                        | -     | -           | -     |
|                                               | Targets            | <i>CmR</i>                   | RSDr% | <i>dnaA</i> | RSDr% | <i>CmR</i>                               | RSDr% | <i>dnaA</i> | RSDr% |
| <i>Corynebacterium glutamicum</i><br>(pXJM19) | Cell culture (18h) | 16.52±0.29                   | 1.73  | 17.40±0.29  | 1.66  | 20.38±0.11                               | 0.54  | 21.79 ±0.43 | 1.97  |
|                                               | 10 <sup>-1</sup>   | 19.47±0.46                   | 2.36  | 19.98±0.17  | 0.87  | 23.31±0.18                               | 0.76  | 24.65 ±0.28 | 1.12  |
|                                               | 10 <sup>-2</sup>   | 22.75±0.70                   | 3.07  | 23.26±0.45  | 1.94  | 26.40±0.09                               | 0.35  | 27.57 ±0.30 | 1.12  |
|                                               | 10 <sup>-3</sup>   | 26.18±0.66                   | 2.53  | 26.58±0.47  | 1.78  | 30.99±0.08                               | 0.27  | 31.55 ±0.65 | 2.06  |
|                                               | 10 <sup>-4</sup>   | 29.51±0.84                   | 2.84  | 29.75±0.42  | 1.41  | 33.40±0.06                               | 0.17  | 33.84 ±0.37 | 1.09  |
|                                               | 10 <sup>-5</sup>   | 32.56±1.25                   | 3.83  | 32.84±0.97  | 2.95  | 34.70±0.13                               | 0.39  | 34.85 ±0.16 | 0.45  |
| Negative control (matrix)                     | LBBHI              | 36.24±0.89                   | 2.45  | 37.06±1.19  | 3.22  | 35.30±0.22                               | 0.62  | 36.21 ±0.09 | 0.24  |
|                                               | SDW                | 36.21±0.56                   | 1.55  | 36.78±0.71  | 1.92  | -                                        | -     | -           | -     |

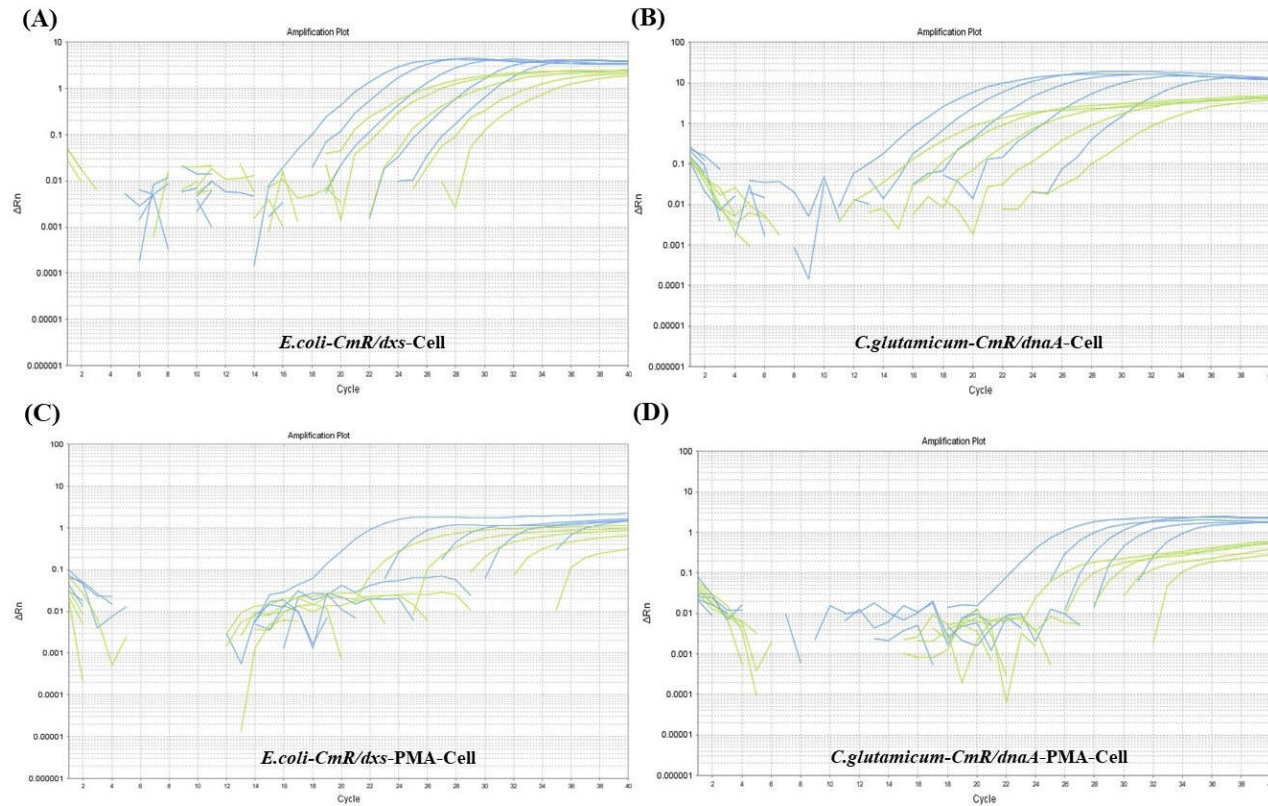

**Figure S2.** Dual-plex qPCR data: utilizing both untreated cell and PMA-treated cell, was assessed following dilution targeting *CmR/dxs* and *CmR/dnaA* for two LM bacterial strains *E. coli* and *C. glutamicum*. (A) cell-direct qPCR for *E. coli* targeting *CmR/dxs*; (B) cell-direct qPCR for *C. glutamicum* targeting *CmR/dnaA*; (C) PMA-treated cell-direct qPCR for *E. coli* targeting *CmR/dxs*; (D) PMA-treated cell-direct qPCR for *C. glutamicum* targeting *CmR/dnaA*.

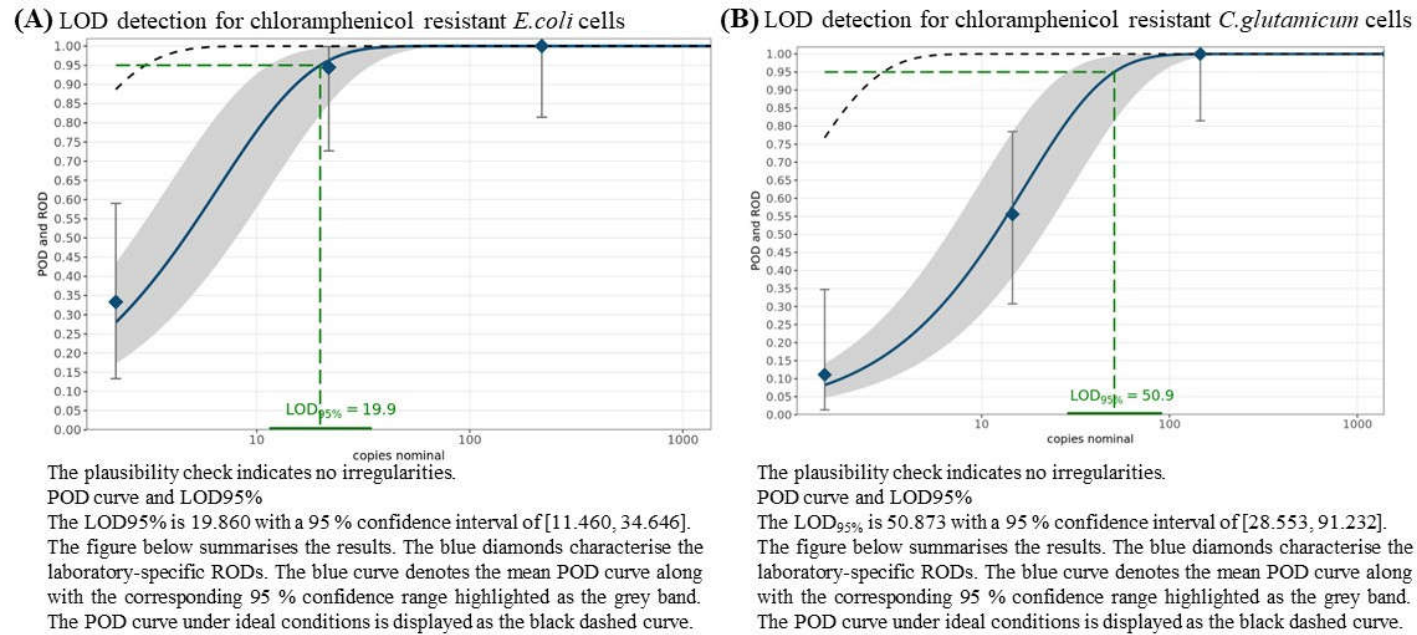

**Figure S3.** Plausibility check of limit of detection (LOD) at 95% confidence interval for viable *E.coli* and *C.glutamicum* cells harboring *CmR*- resistant genes analyzed by Quodata web application; (A) *E.coli* cells; (B) *C.glutamicum* cells.

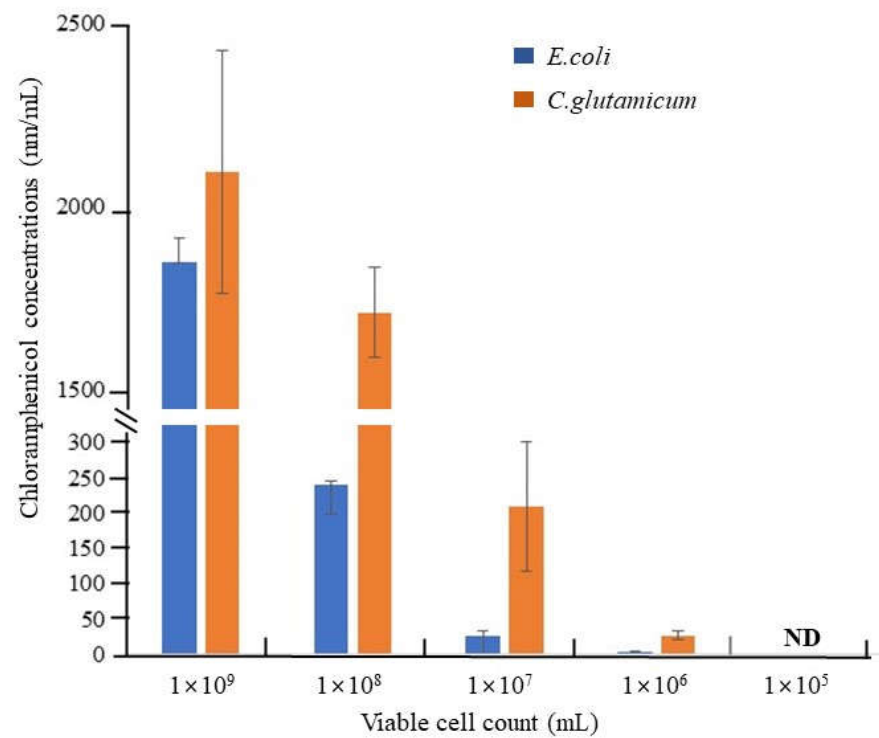

**Figure S4.** Detecting the chloramphenicol concentrations released from viable genetically modified bacterial cells through Enzyme-Linked Immunosorbent Assay (ELISA).
